# Supplementary material for: Performance of Clinical and Biochemical Parameters in Identifying Renal Histopathology and Predictors of One-Year Renal Outcome in Lupus Nephritis—A Single Centre Study from India
Source: MDPI journal article supplement (doi:10.3390/diagnostics12123163), 2022-12-14
Supplement: s1 [file s1]

**Supplementary Table S1: Sensitivity and specificity of baseline parameters to identify proliferative LN, activity parameters and chronicity**

|                                | Proliferative LN |                 |         |         | Crescents       |                 |         |         | Interstitial inflammation |                 |         |         | Chronicity      |                 |         |         |
|--------------------------------|------------------|-----------------|---------|---------|-----------------|-----------------|---------|---------|---------------------------|-----------------|---------|---------|-----------------|-----------------|---------|---------|
| Baseline parameter             | Sensitivity (%)  | Specificity (%) | PPV (%) | NPV (%) | Sensitivity (%) | Specificity (%) | PPV (%) | NPV (%) | Sensitivity (%)           | Specificity (%) | PPV (%) | NPV (%) | Sensitivity (%) | Specificity (%) | PPV (%) | NPV (%) |
| Hypertension                   | 53.4             | 78.2            | 0.04    | 99.9    | 64.4            | 58.0            | 0.02    | 99.9    | 53.9                      | 58.4            | 0.02    | 99.9    | 60.5            | 61.8            | 0.02    | 99.9    |
| Renal dysfunction              | 15.4             | 92.5            | 0.03    | 99.9    | 21.5            | 88.5            | 0.03    | 99.9    | 18.3                      | 91.7            | 0.03    | 99.9    | 21.1            | 91.3            | 0.04    | 99.9    |
| Proteinuria                    | 88.5             | 77.1            | 0.06    | 99.9    | 90.6            | 13.2            | 0.02    | 99.9    | 88.8                      | 12.4            | 0.02    | 99.9    | 90.6            | 14.5            | 0.02    | 99.9    |
| AUS                            | 82.6             | 66.4            | 0.02    | 99.9    | 86.6            | 48.2            | 0.02    | 100.0   | 58.0                      | 41.1            | 0.01    | 99.9    | 60.0            | 42.3            | 0.02    | 99.9    |
| HTN, proteinuria               | 45.5             | 83.7            | 0.04    | 99.9    | 61.1            | 65.0            | 0.03    | 99.9    | 50.0                      | 66.6            | 0.02    | 99.9    | 55.5            | 68.3            | 0.03    | 99.9    |
| HTN, AUS                       | 34.3             | 87.5            | 0.04    | 99.9    | 55.3            | 75.8            | 0.03    | 99.9    | 25.1                      | 73.5            | 0.02    | 99.9    | 39.5            | 74.4            | 0.02    | 99.9    |
| HTN, Renal dysfunction         | 11.4             | 96.3            | 0.05    | 99.9    | 21.5            | 92.7            | 0.04    | 99.9    | 14.0                      | 94.7            | 0.04    | 99.9    | 16.8            | 93.8            | 0.04    | 99.9    |
| Renal dysfunction, proteinuria | 11.1             | 90.3            | 0.05    | 99.9    | 20.0            | 93.1            | 0.04    | 99.9    | 15.4                      | 96.2            | 0.06    | 99.9    | 55.5            | 51.1            | 0.02    | 99.9    |
| Renal dysfunction, AUS         | 11.5             | 95.0            | 0.03    | 99.9    | 16.9            | 92.0            | 0.03    | 99.9    | 12.5                      | 93.0            | 0.03    | 99.9    | 15.8            | 93.7            | 0.04    | 99.9    |
| Proteinuria, AUS               | 53.7             | 71.2            | 0.02    | 99.9    | 79.6            | 56.4            | 0.03    | 99.9    | 54.4                      | 51.0            | 0.02    | 99.9    | 55.7            | 51.5            | 0.02    | 99.9    |
| Renal dysfunction, AUS, HTN    | 53.4             | 78.2            | 0.04    | 99.9    | 16.9            | 95.2            | 0.05    | 99.9    | 53.9                      | 58.4            | 0.02    | 99.9    | 11.6            | 95.8            | 0.04    | 99.9    |

AUS, Active Urinary Sediments; HTN, Hypertension, LN, Lupus Nephritis; NPV, Negative Predictive Value, PPV, Positive Predictive Value

**Supplementary Table S2: Comparison of baseline characteristics among those with and without crescents, fibrinoid necrosis, interstitial inflammation in proliferative LN**

| Parameter                                              | Crescents           |                     |                  | Fibrinoid necrosis  |                     |              | Interstitial inflammation |                    |                  |
|--------------------------------------------------------|---------------------|---------------------|------------------|---------------------|---------------------|--------------|---------------------------|--------------------|------------------|
|                                                        | Present<br>(n = 62) | Absent<br>(n = 174) | P value          | Present<br>(n = 36) | Absent<br>(n = 201) | P value      | Present<br>(n = 112)      | Absent<br>(n = 99) | P value          |
| Female, n (%)                                          | 57(91.9)            | 160(92)             | 0.996            | 32(88.9)            | 186(92.5)           | 0.689        | 102(91.1)                 | 92(92.9)           | 0.621            |
| Hypertension, n (%)                                    | 40(64.5)            | 84(48.3)            | <b>0.041</b>     | 24(66.7)            | 100(49.8)           | <b>0.034</b> | 60(53.6)                  | 50(50.5)           | 0.666            |
| Serum Creatinine (mg/dL), Median (IQR)                 | 0.9(0.7-1.3)        | 0.8(0.6-1.1)        | 0.278            | 0.8(0.6-1.1)        | 0.8(0.7-1.1)        | 0.526        | 0.9(0.7-1.2)              | 0.7(0.6-1.0)       | <b>&lt;0.001</b> |
| Serum Creatinine >1.3g/dL, n (%)                       | 14(22.4)            | 24(13.8)            | 0.106            | 5(13.9)             | 24(16.9)            | 0.773        | 23(20.5)                  | 9(9.1)             | <b>0.021</b>     |
| eGFR, Median (IQR)                                     | 80.2(54.3-114.6)    | 91.5(67-125)        | 0.254            | 84.8(63.5-133.3)    | 86.4(62-115.8)      | 0.806        | 79.2(56.4-104.7)          | 98(69.4-142.9)     | <b>&lt;0.001</b> |
| Active urinary sediments, n (%)                        | 54(87.1)            | 97(55.7)            | <b>&lt;0.001</b> | 25(69.4)            | 127(63.2)           | 0.277        | 63(56.3)                  | 71(71.7)           | <b>0.020</b>     |
| UPCR (mg/mg), Median (IQR)                             | 2.3(1.2-4.3)        | 1.4(0.8-2.3)        | <b>&lt;0.001</b> | 2.2(1.1-5.1)        | 1.5(0.8-2.5)        | <b>0.010</b> | 1.8(1.0-3.4)              | 1.2(0.7-2.5)       | <b>0.023</b>     |
| Renal SLEDAI, Median (IQR)                             | 12(8-12)            | 8(8-12)             | <b>&lt;0.001</b> | 12(8-12)            | 12(8-12)            | 0.213        | 8(8-12)                   | 12(8-12)           | <b>0.003</b>     |
| SLEDAI, Median (IQR)                                   | 18(14-22)           | 18(13-24)           | 0.886            | 19(14-23)           | 18(14-24)           | 0.911        | 18(13-24)                 | 19(14-24)          | 0.292            |
| *Anti- dsDNA high titer positivity, n (%)              | 36(58.1)            | 108(62.1)           | 0.359            | 20(55.6)            | 125(62.2)           | 0.879        | 63(56.3)                  | 63(63.6)           | 0.133            |
| Low C3/C4, n (%)                                       | 48(77.4)            | 130(74.7)           | 0.845            | 29(80.6)            | 150(74.6)           | 0.053        | 80(71.4)                  | 7(77.8)            | 0.708            |
| ACLA/Anti-B2gpI/LAC positivity (any 1 positive), n (%) | 20(32.3)            | 47(27.0)            | 0.502            | 10(27.8)            | 57(28.4)            | 0.800        | 29(25.9)                  | 33(33.3)           | 0.274            |

\*Titre > 100 U/mL; \$-Low C3 <0.9g/L; Low C4 <0.1 g/L; IQR, Inter-Quartile Range; SLEDAI Systemic Lupus Erythematosus Disease Activity Index; UPCR, Urine Protein-Creatinine Ratio; dsDNA, double stranded DeoxyriboNucleic Acid; ACLA, anticardiolipin antibody, B2gpI, Beta2 glycoprotein1; LAC, Lupus Anticoagulant;

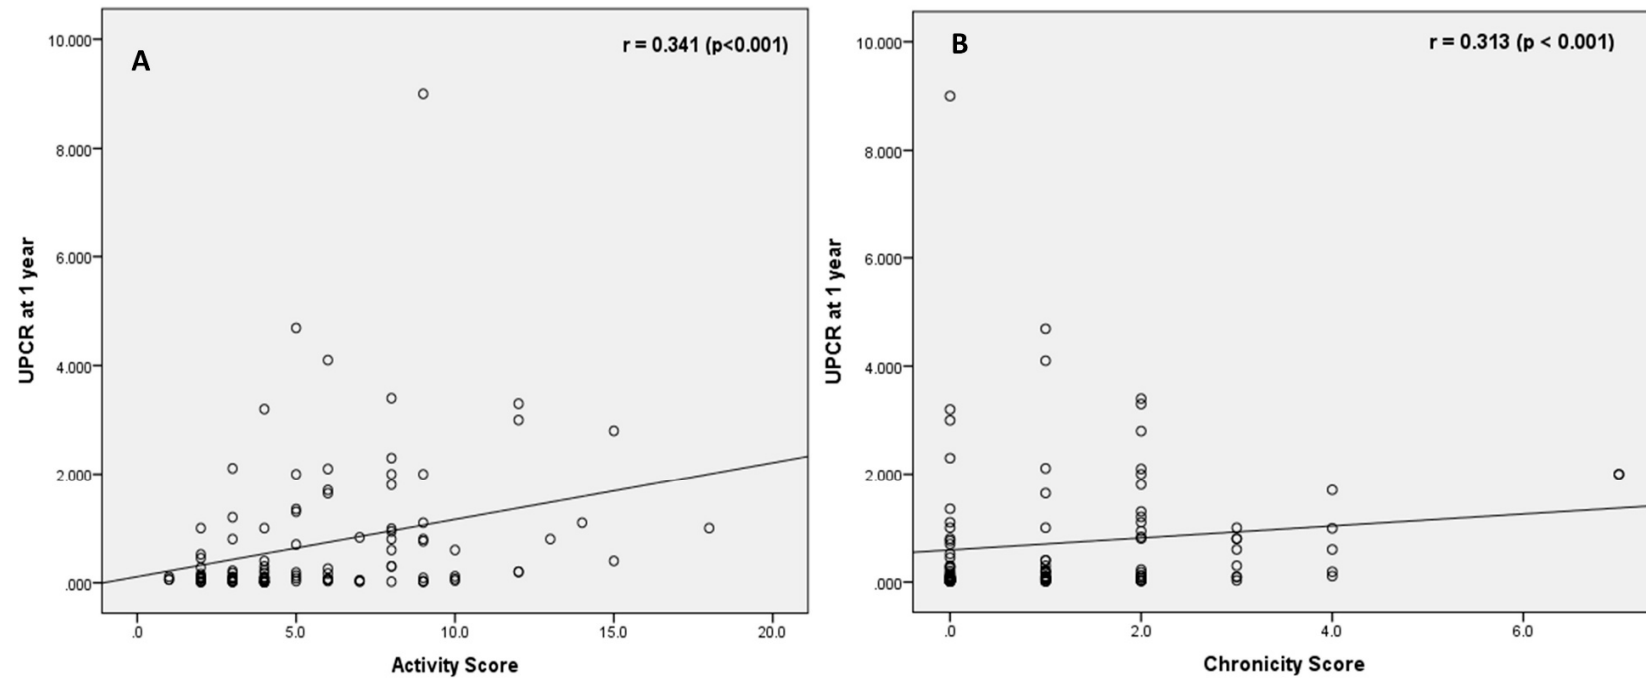

**Figure S1:** Correlation between A) Activity score and UPCR at 1 year; B) Chronicity score and UPCR at 1 year
